# Supplementary material for: Effective weight control via an implanted self-powered vagus nerve stimulation device
Source: PubMed Central journal article supplement (PMC6297229; doi:10.1038/s41467-018-07764-z), 2018-12-17
Supplement: 41467_2018_7764_MOESM2_ESM.pdf [file 41467_2018_7764_MOESM2_ESM.pdf]

## **Description of Additional Supplementary Files**

File Name: Supplementary Movie 1

Description: Voltage output performance test on rats.

File Name: Supplementary Movie 2

Description: CT 3D view.

File Name: Supplementary Movie 3

Description: Normal life of rats with implanted VNS devices.
